# Supplementary material for: A comparison of reference-based algorithms for correcting cell-type heterogeneity in Epigenome-Wide Association Studies
Source: PubMed Central journal article supplement (PMC5307731; doi:10.1186/s12859-017-1511-5), 2017-02-13
Supplement: 12859_2017_1511_MOESM1_ESM.pdf [file 12859_2017_1511_MOESM1_ESM.pdf]

## SUPPLEMENTARY INFORMATION DOCUMENT

FOR

### **A comparison of reference-based algorithms for correcting cell-type heterogeneity in Epigenome-Wide Association Studies**

Andrew E. Teschendorff <sup>1,2,3,\*</sup>, Charles E. Breeze <sup>4</sup>, Shijie C Zheng <sup>1,5</sup> and Stephan Beck <sup>4</sup>

Corresponding author: Andrew E. Teschendorff- [a.teschendorff@ucl.ac.uk](mailto:a.teschendorff@ucl.ac.uk)

1. CAS Key Lab of Computational Biology, CAS-MPG Partner Institute for Computational Biology, Shanghai Institute for Biological Sciences, Chinese Academy of Sciences, Shanghai 20031, China.
2. Department of Women's Cancer, University College London, 74 Huntley Street, London WC1E 6AU, United Kingdom.
3. Statistical Cancer Genomics, Paul O'Gorman Building, UCL Cancer Institute, University College London, 72 Huntley Street, London WC1E 6BT, United Kingdom.
4. Medical Genomics, Paul O'Gorman Building, UCL Cancer Institute, University College London, 72 Huntley Street, London WC1E 6BT, United Kingdom.
5. University of Chinese Academy of Sciences, 19A Yuquan Road, Beijing 100049, China.

#### **DESCRIPTION:**

**This document contains all Supplementary Tables and Supplementary Figures.**

## SUPPLEMENTARY FIGURES

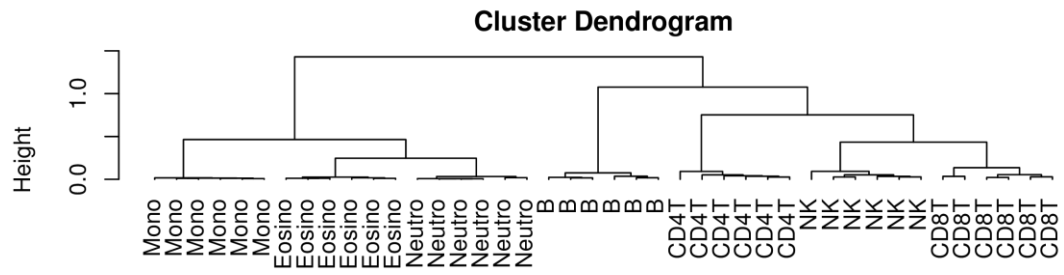

**fig.S1: Clustering validation of reference blood database.** Clustering of purified blood cell subtypes from Reinius et al [1] over the 333 CpGs making up the reference blood database.

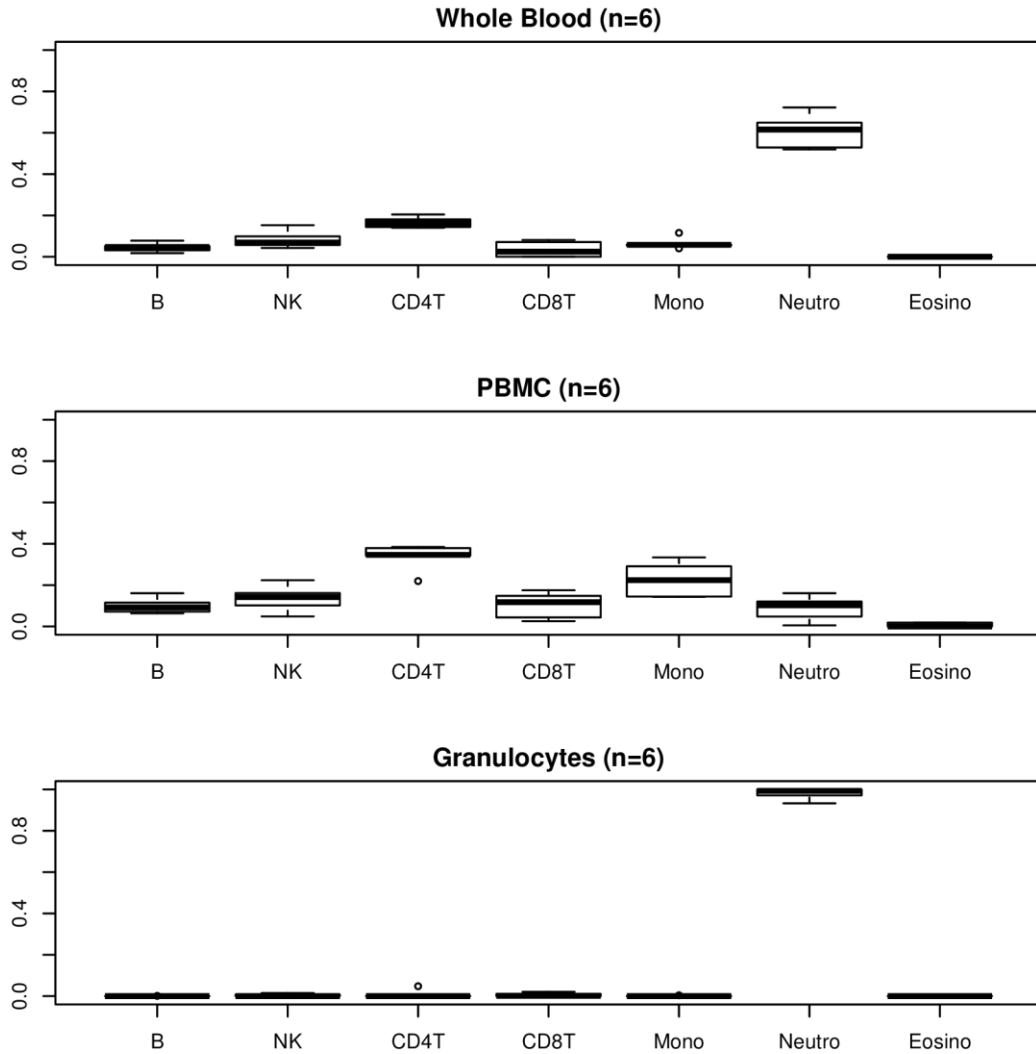

**fig.S2: Validation of EpiDISH.** EpiDISH estimates of the cell subtype proportions (y-axis) of 6 whole blood samples, 6 peripheral blood mononuclear cell samples and 6 granulocyte samples. These samples were taken from Reinius et al, the same dataset from which the purified blood cell types used in the reference centroid construction came from. B=B-cell, NK=Natural Killer, CD4T=CD4+ T-cells, CD8T=CD8+ T-cells, Mon=Monocytes, Neu=Neutrophils, Eos=Eosinophils).

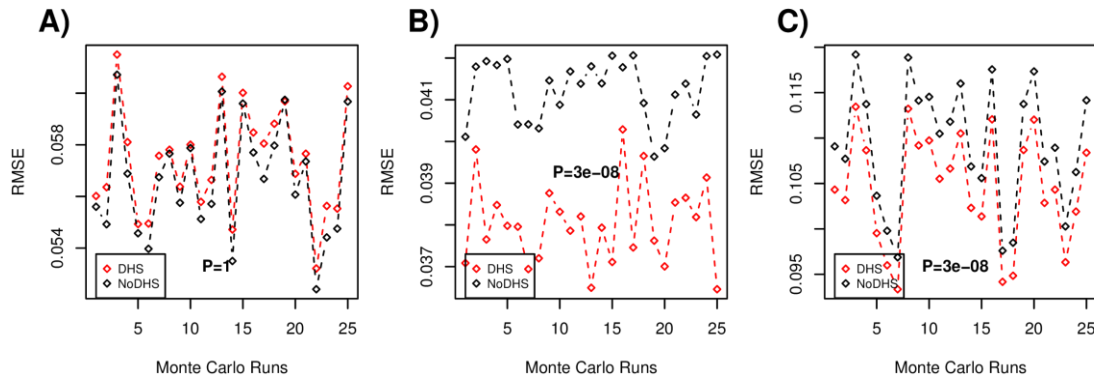

**fig.S3: Improvement of inference using DHS data in 3 independent data sets.** **A)** Using 100 in-silico mixtures of 5 purified blood cell subtypes from Zilbauer et al [2], we compare the Root Mean Square Error values (RMSE, y-axis) of the estimated cell proportions as obtained using EpiDISH between the two different reference databases: one which uses cell-type specific DHSs to select DMCs when constructing the DNAm reference centroids (DHS), and another which only uses DMCs regardless of DHS status (noDHS). The average RMSE value over all cell-types is being shown. A total of 25 different Monte Carlo runs were performed to obtain 25 average RMSE values (x-axis) for each reference database. P-value is from a one-tailed paired Wilcoxon-rank sum test. **B)** As A) but now 100 in-silico generated mixtures of 3 epithelial cell subtypes (breast, renal cortical and pancreas) for which DHS data was available. **C)** As B), but now for 3 other cell subtypes (fetal lung fibroblast-IMR90, hepatocytes and B-cells) with available DHS information and DNAm profiles from two independent studies.

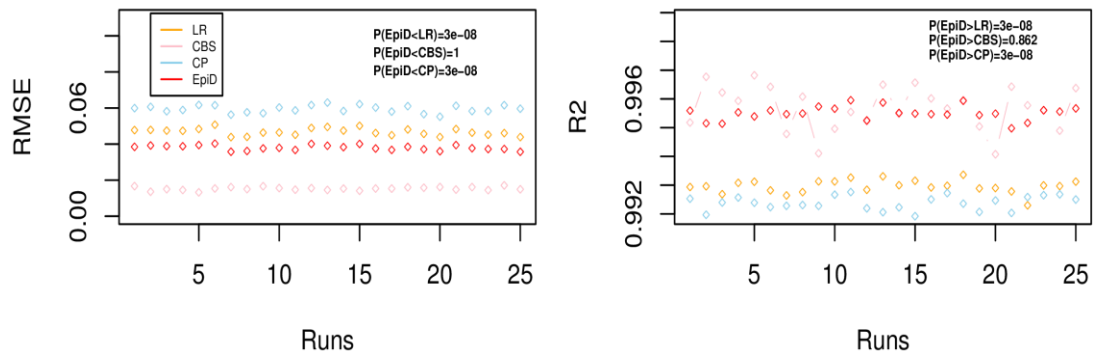

**fig.S4: Comparison of reference-based methods.** **Left panel:** RMSE values of EpiDISH and those of the 3 other reference-based algorithms (LR=linear multivariate regression, CP=constrained projection and CIBERSORT=CBS), as obtained from over 100 in-silico randomly generated mixtures of 3 epithelial cell subtypes (human mammary epithelial cells, human renal cortical epithelial cells and human pancreas). A total of 25 Monte-Carlo runs were performed. P-values are shown between EpiDISH and all others, and are derived from a one-tailed paired Wilcoxon rank sum test. **Right panel:** as left panel, but for the  $R^2$  values.

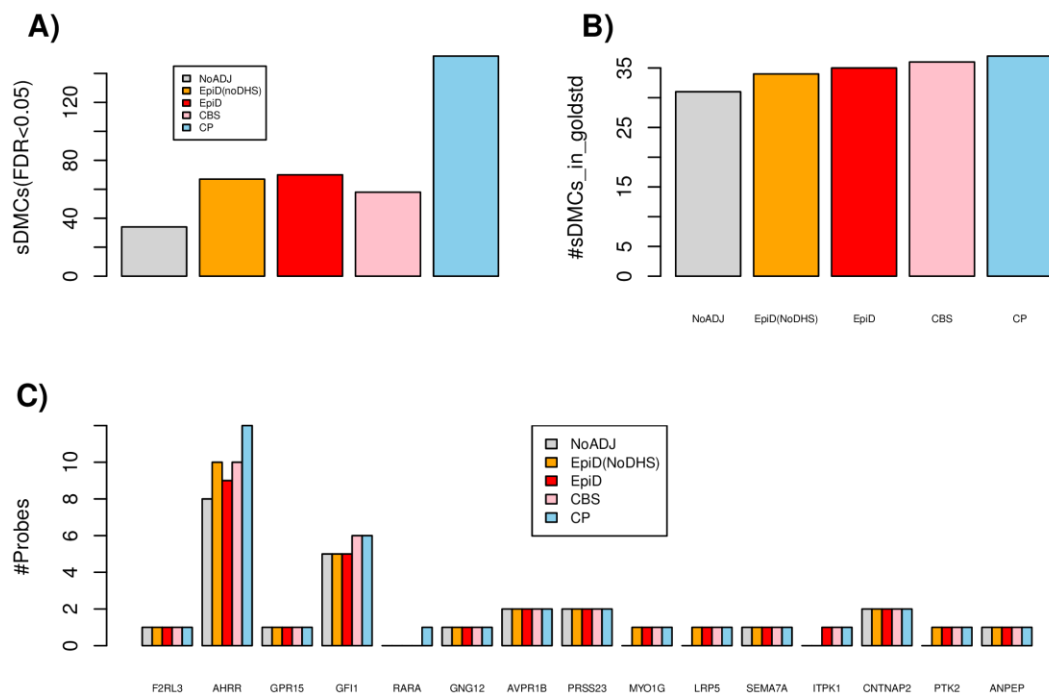

**fig.S5: Comparative performance of reference-based methods in an EWAS of smoking.**

**A)** Comparison of the number of smoking-associated DMCs (sDMCs) at FDR < 0.05 for each of 5 methods: NoADJ=no-adjustment, EpiD(noDHS)=adjustment with RPC using reference with no DHS info, EpiD=adjustment with RPC and a reference with DHS info, CBS=adjustment with CIBERSORT, CP=adjustment with constrained projection. **B)** Comparison of the number of sDMCs identified by each method that mapped to an independently generated gold-standard list of 62 smoking-associated CpGs from Gao et al [3]. **C)** Among the sDMCs identified in A), we indicate the numbers of these that map to the 15 unique genes implicated in the gold-standard list of 62 smoking-associated CpGs.

## SUPPLEMENTARY TABLES

| probeID    | B     | NK    | CD4T  | CD8T  | Gran  | Mono  | Neutro | Eosino |
|------------|-------|-------|-------|-------|-------|-------|--------|--------|
| cg01024458 | 0.034 | 0.962 | 0.969 | 0.958 | 0.994 | 0.987 | 0.992  | 0.991  |
| cg11661493 | 0.037 | 0.954 | 0.971 | 0.964 | 0.961 | 0.958 | 0.962  | 0.962  |
| cg21596498 | 0.06  | 0.98  | 0.989 | 0.989 | 0.978 | 0.98  | 0.976  | 0.984  |
| cg05205074 | 0.049 | 0.954 | 0.967 | 0.961 | 0.981 | 0.967 | 0.979  | 0.986  |
| cg17232476 | 0.045 | 0.962 | 0.969 | 0.958 | 0.976 | 0.932 | 0.98   | 0.976  |
| cg14936008 | 0.065 | 0.976 | 0.98  | 0.983 | 0.981 | 0.977 | 0.983  | 0.986  |

|            |       |       |       |       |       |       |       |       |
|------------|-------|-------|-------|-------|-------|-------|-------|-------|
| cg05579731 | 0.041 | 0.94  | 0.953 | 0.948 | 0.964 | 0.969 | 0.966 | 0.961 |
| cg17995557 | 0.04  | 0.87  | 0.974 | 0.958 | 0.976 | 0.962 | 0.969 | 0.968 |
| cg15035590 | 0.072 | 0.978 | 0.986 | 0.979 | 0.984 | 0.974 | 0.986 | 0.986 |
| cg03248292 | 0.021 | 0.917 | 0.956 | 0.919 | 0.941 | 0.925 | 0.927 | 0.918 |
| cg00760938 | 0.049 | 0.921 | 0.964 | 0.946 | 0.95  | 0.945 | 0.949 | 0.964 |
| cg21743182 | 0.054 | 0.941 | 0.955 | 0.955 | 0.957 | 0.944 | 0.959 | 0.955 |
| cg26552743 | 0.045 | 0.936 | 0.964 | 0.963 | 0.941 | 0.932 | 0.932 | 0.922 |
| cg22212560 | 0.043 | 0.966 | 0.978 | 0.976 | 0.968 | 0.821 | 0.956 | 0.934 |
| cg20602300 | 0.086 | 0.974 | 0.983 | 0.978 | 0.98  | 0.978 | 0.977 | 0.983 |
| cg06889975 | 0.067 | 0.961 | 0.979 | 0.966 | 0.937 | 0.952 | 0.945 | 0.936 |
| cg15532942 | 0.063 | 0.928 | 0.956 | 0.937 | 0.963 | 0.963 | 0.958 | 0.97  |
| cg02665297 | 0.08  | 0.957 | 0.97  | 0.969 | 0.974 | 0.965 | 0.972 | 0.975 |
| cg16148346 | 0.072 | 0.965 | 0.969 | 0.96  | 0.968 | 0.943 | 0.959 | 0.962 |
| cg22498365 | 0.074 | 0.961 | 0.942 | 0.955 | 0.974 | 0.962 | 0.97  | 0.977 |
| cg27565966 | 0.068 | 0.938 | 0.967 | 0.947 | 0.949 | 0.942 | 0.943 | 0.957 |
| cg18184053 | 0.022 | 0.81  | 0.957 | 0.88  | 0.934 | 0.916 | 0.917 | 0.92  |
| cg26810157 | 0.044 | 0.891 | 0.974 | 0.943 | 0.958 | 0.943 | 0.92  | 0.858 |
| cg24466100 | 0.044 | 0.93  | 0.916 | 0.897 | 0.92  | 0.911 | 0.933 | 0.941 |
| cg07597976 | 0.023 | 0.867 | 0.947 | 0.945 | 0.898 | 0.88  | 0.88  | 0.88  |
| cg22907103 | 0.056 | 0.932 | 0.952 | 0.944 | 0.942 | 0.9   | 0.934 | 0.936 |
| cg12976793 | 0.106 | 0.973 | 0.977 | 0.973 | 0.985 | 0.984 | 0.98  | 0.981 |
| cg14060402 | 0.097 | 0.971 | 0.977 | 0.978 | 0.969 | 0.956 | 0.967 | 0.965 |
| cg26795340 | 0.049 | 0.917 | 0.948 | 0.927 | 0.921 | 0.904 | 0.918 | 0.909 |
| cg15287850 | 0.058 | 0.932 | 0.952 | 0.939 | 0.951 | 0.924 | 0.927 | 0.902 |
| cg09469986 | 0.087 | 0.922 | 0.966 | 0.941 | 0.972 | 0.961 | 0.977 | 0.97  |
| cg04828493 | 0.078 | 0.891 | 0.97  | 0.963 | 0.984 | 0.892 | 0.981 | 0.981 |
| cg10147394 | 0.059 | 0.895 | 0.926 | 0.89  | 0.953 | 0.946 | 0.952 | 0.944 |
| cg03980424 | 0.108 | 0.971 | 0.943 | 0.985 | 0.988 | 0.966 | 0.984 | 0.983 |
| cg16185947 | 0.061 | 0.939 | 0.967 | 0.94  | 0.9   | 0.936 | 0.905 | 0.843 |
| cg02582213 | 0.1   | 0.954 | 0.964 | 0.957 | 0.967 | 0.948 | 0.967 | 0.969 |
| cg18067520 | 0.027 | 0.932 | 0.967 | 0.974 | 0.897 | 0.828 | 0.879 | 0.737 |
| cg18590995 | 0.041 | 0.929 | 0.943 | 0.946 | 0.873 | 0.887 | 0.848 | 0.85  |
| cg08939052 | 0.066 | 0.868 | 0.94  | 0.888 | 0.958 | 0.942 | 0.952 | 0.962 |
| cg25131632 | 0.072 | 0.88  | 0.936 | 0.887 | 0.963 | 0.955 | 0.959 | 0.965 |
| cg13915752 | 0.088 | 0.961 | 0.971 | 0.956 | 0.96  | 0.928 | 0.948 | 0.912 |
| cg26160564 | 0.064 | 0.86  | 0.918 | 0.879 | 0.958 | 0.938 | 0.96  | 0.964 |
| cg01869288 | 0.039 | 0.799 | 0.915 | 0.787 | 0.951 | 0.936 | 0.95  | 0.961 |
| cg18664915 | 0.089 | 0.944 | 0.947 | 0.932 | 0.945 | 0.934 | 0.932 | 0.949 |
| cg06963205 | 0.041 | 0.882 | 0.902 | 0.883 | 0.939 | 0.834 | 0.928 | 0.921 |
| cg23730277 | 0.117 | 0.953 | 0.98  | 0.971 | 0.973 | 0.969 | 0.959 | 0.956 |
| cg11160673 | 0.057 | 0.935 | 0.964 | 0.98  | 0.918 | 0.691 | 0.933 | 0.922 |
| cg11193201 | 0.051 | 0.945 | 0.943 | 0.951 | 0.915 | 0.819 | 0.91  | 0.813 |
| cg00226923 | 0.08  | 0.884 | 0.94  | 0.902 | 0.942 | 0.934 | 0.946 | 0.942 |
| cg20666585 | 0.072 | 0.823 | 0.951 | 0.864 | 0.959 | 0.94  | 0.956 | 0.962 |

|            |       |       |       |       |       |       |       |       |
|------------|-------|-------|-------|-------|-------|-------|-------|-------|
| cg27582527 | 0.895 | 0.07  | 0.903 | 0.427 | 0.966 | 0.969 | 0.972 | 0.975 |
| cg06202778 | 0.98  | 0.149 | 0.957 | 0.555 | 0.956 | 0.932 | 0.965 | 0.969 |
| cg09345868 | 0.97  | 0.144 | 0.789 | 0.417 | 0.977 | 0.978 | 0.986 | 0.986 |
| cg26934362 | 0.85  | 0.109 | 0.851 | 0.329 | 0.941 | 0.956 | 0.949 | 0.966 |
| cg05653887 | 0.959 | 0.172 | 0.935 | 0.507 | 0.939 | 0.959 | 0.947 | 0.948 |
| cg07307830 | 0.948 | 0.151 | 0.76  | 0.487 | 0.963 | 0.963 | 0.968 | 0.978 |
| cg21634628 | 0.816 | 0.165 | 0.87  | 0.532 | 0.971 | 0.969 | 0.971 | 0.979 |
| cg02384859 | 0.931 | 0.179 | 0.926 | 0.494 | 0.959 | 0.956 | 0.95  | 0.967 |
| cg03708221 | 0.905 | 0.154 | 0.878 | 0.482 | 0.913 | 0.934 | 0.927 | 0.936 |
| cg02150910 | 0.813 | 0.166 | 0.925 | 0.502 | 0.952 | 0.96  | 0.951 | 0.963 |
| cg20657709 | 0.97  | 0.225 | 0.968 | 0.625 | 0.967 | 0.968 | 0.96  | 0.968 |
| cg03538296 | 0.979 | 0.256 | 0.983 | 0.737 | 0.983 | 0.983 | 0.985 | 0.979 |
| cg19696012 | 0.946 | 0.189 | 0.881 | 0.518 | 0.95  | 0.972 | 0.965 | 0.957 |
| cg27309871 | 0.953 | 0.229 | 0.966 | 0.614 | 0.954 | 0.965 | 0.97  | 0.97  |
| cg21474838 | 0.976 | 0.221 | 0.885 | 0.588 | 0.971 | 0.979 | 0.972 | 0.978 |
| cg05875239 | 0.932 | 0.241 | 0.946 | 0.739 | 0.947 | 0.933 | 0.949 | 0.969 |
| cg24854175 | 0.945 | 0.143 | 0.743 | 0.331 | 0.944 | 0.967 | 0.944 | 0.952 |
| cg01940139 | 0.975 | 0.228 | 0.91  | 0.59  | 0.975 | 0.974 | 0.966 | 0.975 |
| cg14301562 | 0.935 | 0.193 | 0.936 | 0.577 | 0.885 | 0.932 | 0.894 | 0.9   |
| cg18672716 | 0.926 | 0.167 | 0.907 | 0.467 | 0.895 | 0.943 | 0.891 | 0.878 |
| cg26227465 | 0.875 | 0.153 | 0.756 | 0.451 | 0.934 | 0.928 | 0.939 | 0.944 |
| cg13613174 | 0.959 | 0.162 | 0.789 | 0.394 | 0.855 | 0.956 | 0.888 | 0.957 |
| cg09261289 | 0.974 | 0.268 | 0.972 | 0.693 | 0.975 | 0.978 | 0.973 | 0.984 |
| cg15241779 | 0.936 | 0.249 | 0.945 | 0.667 | 0.96  | 0.968 | 0.966 | 0.969 |
| cg20460771 | 0.933 | 0.177 | 0.874 | 0.465 | 0.904 | 0.91  | 0.909 | 0.908 |
| cg05224770 | 0.74  | 0.108 | 0.694 | 0.35  | 0.948 | 0.919 | 0.938 | 0.934 |
| cg13617280 | 0.936 | 0.247 | 0.929 | 0.833 | 0.862 | 0.948 | 0.845 | 0.918 |
| cg04780380 | 0.829 | 0.116 | 0.692 | 0.273 | 0.936 | 0.944 | 0.93  | 0.945 |
| cg10628126 | 0.952 | 0.232 | 0.875 | 0.643 | 0.975 | 0.865 | 0.975 | 0.985 |
| cg13828440 | 0.791 | 0.223 | 0.934 | 0.695 | 0.946 | 0.935 | 0.936 | 0.944 |
| cg12996622 | 0.831 | 0.175 | 0.859 | 0.528 | 0.888 | 0.899 | 0.892 | 0.892 |
| cg26012482 | 0.93  | 0.218 | 0.817 | 0.55  | 0.952 | 0.97  | 0.951 | 0.924 |
| cg14384416 | 0.947 | 0.238 | 0.928 | 0.526 | 0.952 | 0.944 | 0.945 | 0.969 |
| cg10142452 | 0.899 | 0.228 | 0.895 | 0.572 | 0.931 | 0.943 | 0.944 | 0.945 |
| cg22749642 | 0.861 | 0.205 | 0.911 | 0.506 | 0.901 | 0.936 | 0.924 | 0.912 |
| cg18310515 | 0.952 | 0.243 | 0.89  | 0.57  | 0.936 | 0.949 | 0.947 | 0.955 |
| cg17766305 | 0.249 | 0.898 | 0.516 | 0.749 | 0.076 | 0.023 | 0.059 | 0.015 |
| cg18461635 | 0.916 | 0.184 | 0.692 | 0.429 | 0.945 | 0.946 | 0.944 | 0.95  |
| cg21333217 | 0.98  | 0.287 | 0.96  | 0.6   | 0.967 | 0.971 | 0.972 | 0.979 |
| cg02663352 | 0.562 | 0.182 | 0.881 | 0.52  | 0.954 | 0.941 | 0.956 | 0.965 |
| cg07065759 | 0.003 | 0.784 | 0.344 | 0.62  | 0.015 | 0.007 | 0.015 | 0.002 |
| cg11335172 | 0.987 | 0.324 | 0.975 | 0.749 | 0.971 | 0.988 | 0.978 | 0.975 |
| cg16212145 | 0.907 | 0.248 | 0.898 | 0.551 | 0.948 | 0.949 | 0.949 | 0.935 |
| cg20959189 | 0.825 | 0.169 | 0.714 | 0.291 | 0.953 | 0.973 | 0.954 | 0.956 |

|            |       |       |       |       |       |       |       |       |
|------------|-------|-------|-------|-------|-------|-------|-------|-------|
| cg18748064 | 0.863 | 0.233 | 0.877 | 0.477 | 0.955 | 0.963 | 0.956 | 0.958 |
| cg02902412 | 0.971 | 0.267 | 0.982 | 0.441 | 0.961 | 0.969 | 0.952 | 0.978 |
| cg19828970 | 0.023 | 0.929 | 0.854 | 0.928 | 0.04  | 0.03  | 0.04  | 0.02  |
| cg18408209 | 0.897 | 0.239 | 0.915 | 0.506 | 0.933 | 0.936 | 0.919 | 0.931 |
| cg01726890 | 0.923 | 0.195 | 0.852 | 0.422 | 0.883 | 0.896 | 0.883 | 0.861 |
| cg15036529 | 0.793 | 0.186 | 0.611 | 0.475 | 0.962 | 0.974 | 0.94  | 0.968 |
| cg00366435 | 0.978 | 0.939 | 0.15  | 0.632 | 0.979 | 0.984 | 0.963 | 0.93  |
| cg13468685 | 0.15  | 0.076 | 0.895 | 0.593 | 0.045 | 0.039 | 0.053 | 0.021 |
| cg24462702 | 0.933 | 0.816 | 0.132 | 0.838 | 0.848 | 0.879 | 0.865 | 0.847 |
| cg26166854 | 0.973 | 0.773 | 0.131 | 0.478 | 0.97  | 0.979 | 0.961 | 0.987 |
| cg04712122 | 0.96  | 0.826 | 0.1   | 0.196 | 0.927 | 0.968 | 0.959 | 0.987 |
| cg06915826 | 0.973 | 0.895 | 0.147 | 0.408 | 0.955 | 0.96  | 0.963 | 0.978 |
| cg11848483 | 0.971 | 0.917 | 0.153 | 0.371 | 0.981 | 0.982 | 0.969 | 0.991 |
| cg07679948 | 0.968 | 0.89  | 0.163 | 0.474 | 0.955 | 0.969 | 0.951 | 0.984 |
| cg02380585 | 0.01  | 0.268 | 0.903 | 0.886 | 0.032 | 0.009 | 0.037 | 0.002 |
| cg12465678 | 0.425 | 0.093 | 0.908 | 0.622 | 0.055 | 0.032 | 0.058 | 0.018 |
| cg01874152 | 0.893 | 0.888 | 0.168 | 0.482 | 0.98  | 0.983 | 0.976 | 0.988 |
| cg23723835 | 0.717 | 0.891 | 0.136 | 0.489 | 0.963 | 0.972 | 0.965 | 0.98  |
| cg07713946 | 0.975 | 0.831 | 0.155 | 0.398 | 0.968 | 0.978 | 0.963 | 0.977 |
| cg10240150 | 0.96  | 0.811 | 0.141 | 0.392 | 0.938 | 0.953 | 0.942 | 0.967 |
| cg12101498 | 0.02  | 0.118 | 0.85  | 0.623 | 0.111 | 0.067 | 0.091 | 0.017 |
| cg09885622 | 0.214 | 0.118 | 0.915 | 0.664 | 0.213 | 0.127 | 0.181 | 0.041 |
| cg02661764 | 0.908 | 0.905 | 0.163 | 0.533 | 0.877 | 0.848 | 0.898 | 0.942 |
| cg24706505 | 0.229 | 0.106 | 0.837 | 0.534 | 0.04  | 0.056 | 0.044 | 0.014 |
| cg07837085 | 0.237 | 0.055 | 0.794 | 0.391 | 0.037 | 0.038 | 0.041 | 0.015 |
| cg07545925 | 0.952 | 0.687 | 0.106 | 0.068 | 0.963 | 0.973 | 0.956 | 0.982 |
| cg19628988 | 0.173 | 0.444 | 0.933 | 0.907 | 0.091 | 0.019 | 0.051 | 0.025 |
| cg10782923 | 0.944 | 0.886 | 0.198 | 0.498 | 0.92  | 0.929 | 0.931 | 0.971 |
| cg13651908 | 0.953 | 0.813 | 0.179 | 0.461 | 0.947 | 0.952 | 0.922 | 0.938 |
| cg16452866 | 0.969 | 0.784 | 0.156 | 0.227 | 0.953 | 0.978 | 0.957 | 0.977 |
| cg01987702 | 0.018 | 0.108 | 0.761 | 0.463 | 0.02  | 0.016 | 0.014 | 0.002 |
| cg11944101 | 0.902 | 0.85  | 0.096 | 0.852 | 0.621 | 0.683 | 0.625 | 0.595 |
| cg04244970 | 0.247 | 0.033 | 0.759 | 0.292 | 0.023 | 0.016 | 0.033 | 0.009 |
| cg24527636 | 0.9   | 0.782 | 0.122 | 0.191 | 0.91  | 0.908 | 0.906 | 0.958 |
| cg05074138 | 0.953 | 0.801 | 0.181 | 0.406 | 0.931 | 0.943 | 0.932 | 0.941 |
| cg08884752 | 0.859 | 0.881 | 0.142 | 0.48  | 0.855 | 0.812 | 0.851 | 0.839 |
| cg27207932 | 0.96  | 0.878 | 0.082 | 0.806 | 0.378 | 0.715 | 0.432 | 0.57  |
| cg12353788 | 0.954 | 0.787 | 0.164 | 0.357 | 0.889 | 0.935 | 0.904 | 0.911 |
| cg20661080 | 0.925 | 0.809 | 0.192 | 0.395 | 0.961 | 0.961 | 0.958 | 0.963 |
| cg09662852 | 0.085 | 0.066 | 0.76  | 0.463 | 0.042 | 0.03  | 0.046 | 0.017 |
| cg25416125 | 0.914 | 0.819 | 0.171 | 0.432 | 0.892 | 0.901 | 0.89  | 0.924 |
| cg04776231 | 0.129 | 0.33  | 0.877 | 0.877 | 0.066 | 0.022 | 0.048 | 0.01  |
| cg13606287 | 0.974 | 0.567 | 0.168 | 0.382 | 0.972 | 0.978 | 0.966 | 0.987 |
| cg21400549 | 0.485 | 0.33  | 0.927 | 0.735 | 0.113 | 0.064 | 0.091 | 0.009 |



|            |       |       |       |       |       |       |       |       |
|------------|-------|-------|-------|-------|-------|-------|-------|-------|
| cg25226014 | 0.96  | 0.582 | 0.152 | 0.292 | 0.972 | 0.974 | 0.966 | 0.982 |
| cg10099758 | 0.048 | 0.175 | 0.813 | 0.613 | 0.135 | 0.045 | 0.138 | 0.019 |
| cg10837404 | 0.988 | 0.962 | 0.321 | 0.838 | 0.983 | 0.988 | 0.987 | 0.992 |
| cg14564351 | 0.123 | 0.156 | 0.746 | 0.309 | 0.056 | 0.029 | 0.035 | 0.006 |
| cg16193207 | 0.972 | 0.897 | 0.245 | 0.508 | 0.969 | 0.969 | 0.959 | 0.975 |
| cg24902461 | 0.095 | 0.518 | 0.9   | 0.849 | 0.073 | 0.04  | 0.067 | 0.023 |
| cg10599446 | 0.958 | 0.658 | 0.146 | 0.269 | 0.9   | 0.926 | 0.938 | 0.929 |
| cg07015803 | 0.957 | 0.742 | 0.167 | 0.234 | 0.934 | 0.963 | 0.935 | 0.97  |
| cg18154117 | 0.866 | 0.816 | 0.176 | 0.45  | 0.909 | 0.892 | 0.899 | 0.921 |
| cg11230435 | 0.05  | 0.028 | 0.721 | 0.408 | 0.014 | 0.025 | 0.024 | 0.003 |
| cg04642300 | 0.18  | 0.042 | 0.758 | 0.475 | 0.025 | 0.023 | 0.034 | 0.013 |
| cg07930673 | 0.954 | 0.701 | 0.145 | 0.12  | 0.949 | 0.957 | 0.948 | 0.967 |
| cg25939861 | 0.936 | 0.61  | 0.906 | 0.079 | 0.948 | 0.932 | 0.947 | 0.961 |
| cg00219921 | 0.981 | 0.83  | 0.915 | 0.165 | 0.971 | 0.968 | 0.966 | 0.978 |
| cg10977115 | 0.971 | 0.281 | 0.427 | 0.023 | 0.969 | 0.972 | 0.96  | 0.975 |
| cg22512531 | 0.97  | 0.248 | 0.571 | 0.05  | 0.965 | 0.969 | 0.963 | 0.978 |
| cg06164961 | 0.98  | 0.575 | 0.137 | 0.057 | 0.968 | 0.976 | 0.958 | 0.98  |
| cg26848126 | 0.024 | 0.432 | 0.411 | 0.871 | 0.049 | 0.024 | 0.055 | 0.016 |
| cg24456340 | 0.985 | 0.262 | 0.696 | 0.108 | 0.972 | 0.979 | 0.978 | 0.933 |
| cg25643644 | 0.963 | 0.572 | 0.122 | 0.059 | 0.944 | 0.956 | 0.939 | 0.957 |
| cg20894640 | 0.97  | 0.207 | 0.265 | 0.036 | 0.961 | 0.964 | 0.95  | 0.975 |
| cg24841244 | 0.97  | 0.668 | 0.152 | 0.092 | 0.949 | 0.96  | 0.937 | 0.971 |
| cg27470208 | 0.953 | 0.288 | 0.19  | 0.033 | 0.949 | 0.953 | 0.95  | 0.968 |
| cg22689323 | 0.973 | 0.309 | 0.175 | 0.036 | 0.946 | 0.965 | 0.945 | 0.937 |
| cg24612198 | 0.973 | 0.598 | 0.146 | 0.09  | 0.965 | 0.969 | 0.955 | 0.979 |
| cg09088496 | 0.96  | 0.249 | 0.171 | 0.031 | 0.941 | 0.959 | 0.938 | 0.977 |
| cg07661835 | 0.962 | 0.696 | 0.471 | 0.153 | 0.915 | 0.93  | 0.939 | 0.97  |
| cg05356800 | 0.859 | 0.25  | 0.796 | 0.098 | 0.89  | 0.891 | 0.916 | 0.927 |
| cg25711558 | 0.057 | 0.568 | 0.873 | 0.934 | 0.059 | 0.021 | 0.052 | 0.008 |
| cg13750061 | 0.956 | 0.728 | 0.156 | 0.116 | 0.953 | 0.952 | 0.958 | 0.971 |
| cg09453312 | 0.955 | 0.123 | 0.096 | 0.008 | 0.945 | 0.96  | 0.959 | 0.97  |
| cg14506192 | 0.962 | 0.244 | 0.558 | 0.106 | 0.956 | 0.958 | 0.944 | 0.979 |
| cg09032544 | 0.956 | 0.283 | 0.228 | 0.05  | 0.899 | 0.951 | 0.916 | 0.976 |
| cg00467547 | 0.957 | 0.154 | 0.089 | 0.012 | 0.96  | 0.955 | 0.946 | 0.971 |
| cg00277591 | 0.979 | 0.198 | 0.138 | 0.016 | 0.896 | 0.956 | 0.897 | 0.93  |
| cg27008565 | 0.933 | 0.158 | 0.439 | 0.061 | 0.954 | 0.945 | 0.937 | 0.954 |
| cg09354050 | 0.958 | 0.3   | 0.113 | 0.032 | 0.927 | 0.951 | 0.919 | 0.923 |
| cg17477578 | 0.885 | 0.178 | 0.149 | 0.021 | 0.951 | 0.962 | 0.955 | 0.965 |
| cg11531557 | 0.935 | 0.629 | 0.503 | 0.157 | 0.933 | 0.942 | 0.937 | 0.951 |
| cg02324835 | 0.925 | 0.646 | 0.381 | 0.143 | 0.937 | 0.94  | 0.947 | 0.963 |
| cg15935770 | 0.036 | 0.89  | 0.939 | 0.985 | 0.068 | 0.018 | 0.071 | 0.007 |
| cg22999502 | 0.824 | 0.523 | 0.336 | 0.086 | 0.926 | 0.933 | 0.903 | 0.935 |
| cg23318020 | 0.864 | 0.555 | 0.153 | 0.078 | 0.933 | 0.949 | 0.924 | 0.959 |
| cg09145126 | 0.069 | 0.771 | 0.901 | 0.964 | 0.079 | 0.027 | 0.068 | 0.011 |

|            |       |       |       |       |       |       |       |       |
|------------|-------|-------|-------|-------|-------|-------|-------|-------|
| cg22742001 | 0.054 | 0.894 | 0.947 | 0.98  | 0.035 | 0.014 | 0.032 | 0.002 |
| cg25025181 | 0.152 | 0.661 | 0.922 | 0.954 | 0.033 | 0.016 | 0.036 | 0.001 |
| cg21330949 | 0.887 | 0.145 | 0.219 | 0.017 | 0.924 | 0.933 | 0.902 | 0.943 |
| cg09909069 | 0.962 | 0.285 | 0.136 | 0.049 | 0.952 | 0.955 | 0.939 | 0.943 |
| cg27111890 | 0.975 | 0.668 | 0.189 | 0.124 | 0.937 | 0.965 | 0.942 | 0.922 |
| cg24448340 | 0.061 | 0.913 | 0.932 | 0.983 | 0.045 | 0.022 | 0.047 | 0.005 |
| cg11760500 | 0.84  | 0.187 | 0.117 | 0.023 | 0.976 | 0.979 | 0.956 | 0.961 |
| cg18463607 | 0.928 | 0.299 | 0.133 | 0.063 | 0.967 | 0.969 | 0.958 | 0.985 |
| cg16093065 | 0.978 | 0.353 | 0.177 | 0.09  | 0.969 | 0.972 | 0.969 | 0.981 |
| cg09232358 | 0.949 | 0.671 | 0.206 | 0.128 | 0.933 | 0.927 | 0.931 | 0.969 |
| cg14278300 | 0.929 | 0.259 | 0.227 | 0.051 | 0.909 | 0.916 | 0.913 | 0.945 |
| cg23671196 | 0.096 | 0.778 | 0.797 | 0.944 | 0.067 | 0.035 | 0.065 | 0.01  |
| cg20487608 | 0.012 | 0.783 | 0.877 | 0.934 | 0.025 | 0.017 | 0.027 | 0.006 |
| cg19994968 | 0.955 | 0.643 | 0.158 | 0.124 | 0.949 | 0.963 | 0.946 | 0.959 |
| cg15046489 | 0.949 | 0.189 | 0.252 | 0.064 | 0.95  | 0.956 | 0.951 | 0.961 |
| cg26872907 | 0.963 | 0.865 | 0.837 | 0.963 | 0.964 | 0.095 | 0.957 | 0.964 |
| cg00701951 | 0.981 | 0.922 | 0.935 | 0.958 | 0.754 | 0.099 | 0.78  | 0.941 |
| cg19301114 | 0.884 | 0.798 | 0.852 | 0.909 | 0.929 | 0.068 | 0.93  | 0.949 |
| cg26538782 | 0.741 | 0.965 | 0.966 | 0.989 | 0.957 | 0.116 | 0.948 | 0.979 |
| cg23244761 | 0.98  | 0.911 | 0.902 | 0.985 | 0.982 | 0.141 | 0.976 | 0.982 |
| cg07002540 | 0.96  | 0.89  | 0.886 | 0.958 | 0.802 | 0.115 | 0.833 | 0.927 |
| cg08538581 | 0.67  | 0.947 | 0.929 | 0.962 | 0.736 | 0.073 | 0.765 | 0.918 |
| cg09220326 | 0.975 | 0.936 | 0.931 | 0.975 | 0.455 | 0.061 | 0.504 | 0.777 |
| cg06489037 | 0.978 | 0.936 | 0.927 | 0.975 | 0.4   | 0.073 | 0.486 | 0.86  |
| cg18066690 | 0.977 | 0.961 | 0.941 | 0.978 | 0.982 | 0.184 | 0.971 | 0.978 |
| cg06297318 | 0.949 | 0.944 | 0.937 | 0.957 | 0.906 | 0.149 | 0.865 | 0.932 |
| cg17594003 | 0.93  | 0.939 | 0.959 | 0.98  | 0.524 | 0.073 | 0.566 | 0.745 |
| cg16429499 | 0.411 | 0.916 | 0.929 | 0.977 | 0.964 | 0.081 | 0.966 | 0.968 |
| cg13430807 | 0.881 | 0.862 | 0.865 | 0.957 | 0.93  | 0.129 | 0.919 | 0.927 |
| cg23146741 | 0.768 | 0.774 | 0.865 | 0.894 | 0.895 | 0.089 | 0.911 | 0.956 |
| cg17660833 | 0.952 | 0.901 | 0.928 | 0.948 | 0.43  | 0.095 | 0.546 | 0.928 |
| cg22957691 | 0.989 | 0.889 | 0.953 | 0.981 | 0.081 | 0.031 | 0.249 | 0.744 |
| cg10278149 | 0.941 | 0.922 | 0.938 | 0.969 | 0.75  | 0.116 | 0.76  | 0.776 |
| cg27059140 | 0.968 | 0.93  | 0.954 | 0.968 | 0.485 | 0.077 | 0.513 | 0.739 |
| cg13093111 | 0.962 | 0.924 | 0.966 | 0.982 | 0.502 | 0.062 | 0.51  | 0.624 |
| cg00091349 | 0.847 | 0.839 | 0.869 | 0.923 | 0.484 | 0.031 | 0.54  | 0.742 |
| cg10933959 | 0.986 | 0.966 | 0.959 | 0.99  | 0.292 | 0.08  | 0.395 | 0.744 |
| cg12207930 | 0.898 | 0.913 | 0.897 | 0.947 | 0.657 | 0.11  | 0.681 | 0.887 |
| cg11814087 | 0.945 | 0.89  | 0.922 | 0.962 | 0.238 | 0.059 | 0.38  | 0.808 |
| cg09322573 | 0.903 | 0.926 | 0.948 | 0.976 | 0.667 | 0.104 | 0.663 | 0.757 |
| cg10624395 | 0.956 | 0.931 | 0.925 | 0.965 | 0.981 | 0.196 | 0.976 | 0.963 |
| cg00208012 | 0.882 | 0.903 | 0.894 | 0.954 | 0.948 | 0.163 | 0.92  | 0.96  |
| cg12655112 | 0.878 | 0.889 | 0.852 | 0.956 | 0.673 | 0.092 | 0.689 | 0.817 |
| cg02190353 | 0.948 | 0.894 | 0.906 | 0.962 | 0.12  | 0.032 | 0.28  | 0.726 |

|            |       |       |       |       |       |       |       |       |
|------------|-------|-------|-------|-------|-------|-------|-------|-------|
| cg13932501 | 0.962 | 0.927 | 0.926 | 0.963 | 0.292 | 0.064 | 0.396 | 0.724 |
| cg03533256 | 0.895 | 0.726 | 0.804 | 0.806 | 0.77  | 0.074 | 0.794 | 0.926 |
| cg14985891 | 0.973 | 0.917 | 0.934 | 0.967 | 0.088 | 0.026 | 0.204 | 0.653 |
| cg11118440 | 0.885 | 0.881 | 0.829 | 0.914 | 0.429 | 0.078 | 0.537 | 0.918 |
| cg08908131 | 0.912 | 0.783 | 0.871 | 0.87  | 0.948 | 0.138 | 0.937 | 0.949 |
| cg23391288 | 0.918 | 0.929 | 0.903 | 0.972 | 0.987 | 0.201 | 0.982 | 0.99  |
| cg15835339 | 0.958 | 0.907 | 0.927 | 0.95  | 0.279 | 0.069 | 0.39  | 0.771 |
| cg19082496 | 0.963 | 0.849 | 0.905 | 0.914 | 0.205 | 0.033 | 0.312 | 0.741 |
| cg21683390 | 0.845 | 0.905 | 0.946 | 0.979 | 0.385 | 0.075 | 0.466 | 0.798 |
| cg21814550 | 0.962 | 0.946 | 0.951 | 0.961 | 0.182 | 0.059 | 0.296 | 0.705 |
| cg04605532 | 0.97  | 0.944 | 0.934 | 0.983 | 0.204 | 0.06  | 0.305 | 0.677 |
| cg18990407 | 0.569 | 0.925 | 0.923 | 0.964 | 0.869 | 0.121 | 0.863 | 0.929 |
| cg03002688 | 0.873 | 0.9   | 0.824 | 0.948 | 0.287 | 0.05  | 0.408 | 0.787 |
| cg02780988 | 0.772 | 0.851 | 0.878 | 0.902 | 0.922 | 0.137 | 0.918 | 0.933 |
| cg23363263 | 0.945 | 0.96  | 0.962 | 0.983 | 0.178 | 0.072 | 0.314 | 0.692 |
| cg01110616 | 0.981 | 0.922 | 0.959 | 0.945 | 0.8   | 0.178 | 0.798 | 0.875 |
| cg20978247 | 0.94  | 0.927 | 0.935 | 0.984 | 0.445 | 0.113 | 0.502 | 0.801 |
| cg09310966 | 0.972 | 0.855 | 0.878 | 0.935 | 0.474 | 0.087 | 0.534 | 0.757 |
| cg19358608 | 0.955 | 0.913 | 0.922 | 0.954 | 0.558 | 0.098 | 0.59  | 0.665 |
| cg05242065 | 0.933 | 0.95  | 0.81  | 0.968 | 0.891 | 0.187 | 0.917 | 0.948 |
| cg17541002 | 0.725 | 0.93  | 0.906 | 0.978 | 0.153 | 0.055 | 0.302 | 0.892 |
| cg22381196 | 0.992 | 0.99  | 0.99  | 0.996 | 0.049 | 0.815 | 0.079 | 0.072 |
| cg21685770 | 0.94  | 0.952 | 0.974 | 0.976 | 0.046 | 0.786 | 0.079 | 0.204 |
| cg00439981 | 0.994 | 0.979 | 0.984 | 0.995 | 0.046 | 0.624 | 0.074 | 0.008 |
| cg11557901 | 0.99  | 0.979 | 0.974 | 0.979 | 0.051 | 0.472 | 0.055 | 0.009 |
| cg05344747 | 0.819 | 0.975 | 0.972 | 0.987 | 0.11  | 0.855 | 0.094 | 0.023 |
| cg09859659 | 0.952 | 0.948 | 0.979 | 0.977 | 0.133 | 0.916 | 0.155 | 0.192 |
| cg25968394 | 0.971 | 0.977 | 0.976 | 0.983 | 0.112 | 0.721 | 0.13  | 0.181 |
| cg04609694 | 0.976 | 0.972 | 0.979 | 0.978 | 0.093 | 0.881 | 0.209 | 0.493 |
| cg13468144 | 0.985 | 0.978 | 0.951 | 0.976 | 0.112 | 0.952 | 0.278 | 0.832 |
| cg13178361 | 0.955 | 0.947 | 0.958 | 0.965 | 0.099 | 0.759 | 0.111 | 0.07  |
| cg13396713 | 0.983 | 0.97  | 0.965 | 0.985 | 0.066 | 0.477 | 0.071 | 0.01  |
| cg02021919 | 0.972 | 0.96  | 0.961 | 0.961 | 0.105 | 0.787 | 0.14  | 0.157 |
| cg11922563 | 0.956 | 0.895 | 0.931 | 0.946 | 0.024 | 0.386 | 0.038 | 0.019 |
| cg25025545 | 0.964 | 0.942 | 0.953 | 0.974 | 0.045 | 0.377 | 0.055 | 0.009 |
| cg27200257 | 0.951 | 0.933 | 0.937 | 0.922 | 0.086 | 0.699 | 0.1   | 0.02  |
| cg03406844 | 0.927 | 0.934 | 0.934 | 0.929 | 0.122 | 0.828 | 0.131 | 0.091 |
| cg09993145 | 0.119 | 0.025 | 0.037 | 0.009 | 0.829 | 0.083 | 0.83  | 0.888 |
| cg11354682 | 0.012 | 0.053 | 0.34  | 0.347 | 0.933 | 0.08  | 0.931 | 0.945 |
| cg23819411 | 0.958 | 0.938 | 0.95  | 0.948 | 0.107 | 0.68  | 0.226 | 0.683 |
| cg16125725 | 0.979 | 0.97  | 0.971 | 0.979 | 0.096 | 0.597 | 0.244 | 0.757 |
| cg14059339 | 0.972 | 0.953 | 0.937 | 0.975 | 0.064 | 0.371 | 0.087 | 0.098 |
| cg09109411 | 0.98  | 0.934 | 0.959 | 0.972 | 0.096 | 0.431 | 0.084 | 0.007 |
| cg05486872 | 0.968 | 0.466 | 0.953 | 0.803 | 0.052 | 0.869 | 0.049 | 0.005 |

|            |       |       |       |       |       |       |       |       |
|------------|-------|-------|-------|-------|-------|-------|-------|-------|
| cg21341487 | 0.927 | 0.91  | 0.93  | 0.962 | 0.072 | 0.506 | 0.082 | 0.015 |
| cg27545615 | 0.87  | 0.856 | 0.829 | 0.876 | 0.037 | 0.625 | 0.051 | 0.007 |
| cg13633625 | 0.93  | 0.964 | 0.977 | 0.974 | 0.103 | 0.686 | 0.254 | 0.741 |
| cg11597277 | 0.988 | 0.977 | 0.985 | 0.985 | 0.177 | 0.714 | 0.223 | 0.424 |
| cg11389756 | 0.966 | 0.927 | 0.937 | 0.961 | 0.048 | 0.247 | 0.056 | 0.018 |
| cg07356342 | 0.964 | 0.93  | 0.935 | 0.957 | 0.08  | 0.482 | 0.135 | 0.262 |
| cg15033269 | 0.887 | 0.895 | 0.943 | 0.948 | 0.06  | 0.473 | 0.075 | 0.015 |
| cg25757820 | 0.987 | 0.976 | 0.99  | 0.989 | 0.168 | 0.836 | 0.323 | 0.861 |
| cg25605731 | 0.872 | 0.945 | 0.957 | 0.954 | 0.067 | 0.497 | 0.091 | 0.02  |
| cg26341831 | 0.015 | 0.046 | 0.157 | 0.019 | 0.873 | 0.264 | 0.777 | 0.467 |
| cg00405190 | 0.953 | 0.936 | 0.887 | 0.948 | 0.074 | 0.465 | 0.098 | 0.094 |
| cg13785123 | 0.98  | 0.977 | 0.977 | 0.982 | 0.194 | 0.84  | 0.321 | 0.859 |
| cg14919455 | 0.955 | 0.935 | 0.94  | 0.968 | 0.096 | 0.435 | 0.093 | 0.013 |
| cg13079571 | 0.968 | 0.971 | 0.968 | 0.976 | 0.164 | 0.781 | 0.207 | 0.26  |
| cg13618516 | 0.983 | 0.951 | 0.966 | 0.978 | 0.103 | 0.405 | 0.115 | 0.084 |
| cg23334433 | 0.977 | 0.94  | 0.946 | 0.966 | 0.039 | 0.175 | 0.056 | 0.004 |
| cg05171937 | 0.926 | 0.98  | 0.98  | 0.986 | 0.14  | 0.684 | 0.257 | 0.655 |
| cg09727050 | 0.939 | 0.886 | 0.92  | 0.918 | 0.058 | 0.265 | 0.078 | 0.207 |
| cg12019801 | 0.971 | 0.919 | 0.92  | 0.971 | 0.058 | 0.266 | 0.091 | 0.138 |
| cg08279189 | 0.986 | 0.959 | 0.971 | 0.974 | 0.048 | 0.202 | 0.076 | 0.004 |
| cg06766034 | 0.911 | 0.907 | 0.876 | 0.942 | 0.059 | 0.367 | 0.063 | 0.013 |
| cg05655915 | 0.946 | 0.887 | 0.884 | 0.907 | 0.045 | 0.359 | 0.059 | 0.006 |
| cg15891546 | 0.794 | 0.806 | 0.941 | 0.924 | 0.084 | 0.657 | 0.083 | 0.005 |
| cg10699171 | 0.051 | 0.083 | 0.07  | 0.027 | 0.905 | 0.613 | 0.896 | 0.907 |
| cg01040749 | 0.973 | 0.977 | 0.976 | 0.977 | 0.156 | 0.865 | 0.284 | 0.563 |
| cg14268557 | 0.967 | 0.955 | 0.943 | 0.973 | 0.084 | 0.233 | 0.079 | 0.025 |
| cg09163720 | 0.974 | 0.956 | 0.96  | 0.956 | 0.174 | 0.719 | 0.204 | 0.277 |
| cg21237481 | 0.989 | 0.98  | 0.988 | 0.979 | 0.82  | 0.936 | 0.735 | 0.12  |
| cg10342963 | 0.962 | 0.961 | 0.968 | 0.966 | 0.282 | 0.937 | 0.208 | 0.021 |
| cg26814100 | 0.986 | 0.98  | 0.982 | 0.98  | 0.333 | 0.818 | 0.315 | 0.057 |
| cg18380211 | 0.974 | 0.976 | 0.98  | 0.976 | 0.937 | 0.946 | 0.844 | 0.167 |
| cg21346154 | 0.962 | 0.987 | 0.983 | 0.99  | 0.588 | 0.875 | 0.544 | 0.118 |
| cg01953317 | 0.97  | 0.985 | 0.983 | 0.982 | 0.975 | 0.977 | 0.897 | 0.194 |
| cg23990557 | 0.968 | 0.949 | 0.968 | 0.957 | 0.625 | 0.936 | 0.549 | 0.118 |
| cg04128967 | 0.85  | 0.916 | 0.959 | 0.937 | 0.854 | 0.875 | 0.776 | 0.127 |
| cg01012879 | 0.96  | 0.945 | 0.967 | 0.955 | 0.281 | 0.94  | 0.271 | 0.082 |
| cg01742370 | 0.969 | 0.971 | 0.969 | 0.977 | 0.19  | 0.541 | 0.198 | 0.025 |
| cg04003615 | 0.905 | 0.908 | 0.936 | 0.95  | 0.322 | 0.658 | 0.262 | 0.025 |
| cg00290355 | 0.925 | 0.927 | 0.949 | 0.966 | 0.632 | 0.78  | 0.571 | 0.118 |
| cg17470397 | 0.993 | 0.983 | 0.982 | 0.992 | 0.951 | 0.738 | 0.842 | 0.188 |
| cg01655008 | 0.979 | 0.962 | 0.953 | 0.985 | 0.268 | 0.558 | 0.217 | 0.047 |
| cg02722672 | 0.948 | 0.923 | 0.951 | 0.952 | 0.35  | 0.815 | 0.32  | 0.094 |
| cg04836151 | 0.986 | 0.976 | 0.985 | 0.99  | 0.438 | 0.797 | 0.411 | 0.135 |
| cg23012855 | 0.966 | 0.97  | 0.969 | 0.965 | 0.9   | 0.928 | 0.788 | 0.21  |

|            |       |       |       |       |       |       |       |       |
|------------|-------|-------|-------|-------|-------|-------|-------|-------|
| cg04306507 | 0.79  | 0.961 | 0.961 | 0.974 | 0.528 | 0.762 | 0.499 | 0.106 |
| cg25738116 | 0.949 | 0.867 | 0.902 | 0.887 | 0.5   | 0.837 | 0.457 | 0.098 |
| cg07769015 | 0.952 | 0.926 | 0.944 | 0.958 | 0.259 | 0.547 | 0.222 | 0.04  |
| cg01081737 | 0.965 | 0.95  | 0.946 | 0.961 | 0.199 | 0.508 | 0.181 | 0.038 |
| cg26165081 | 0.965 | 0.957 | 0.97  | 0.974 | 0.444 | 0.612 | 0.407 | 0.101 |
| cg11690666 | 0.987 | 0.976 | 0.973 | 0.986 | 0.19  | 0.64  | 0.194 | 0.082 |
| cg00114012 | 0.946 | 0.926 | 0.918 | 0.914 | 0.809 | 0.923 | 0.71  | 0.178 |
| cg06829969 | 0.831 | 0.913 | 0.954 | 0.965 | 0.221 | 0.527 | 0.175 | 0.02  |
| cg23540819 | 0.845 | 0.88  | 0.919 | 0.916 | 0.484 | 0.772 | 0.454 | 0.092 |
| cg03329755 | 0.986 | 0.981 | 0.987 | 0.985 | 0.923 | 0.976 | 0.788 | 0.248 |
| cg25003924 | 0.866 | 0.92  | 0.91  | 0.934 | 0.483 | 0.717 | 0.445 | 0.098 |
| cg02832512 | 0.926 | 0.853 | 0.921 | 0.867 | 0.184 | 0.801 | 0.178 | 0.057 |
| cg02974085 | 0.362 | 0.978 | 0.979 | 0.982 | 0.849 | 0.847 | 0.756 | 0.117 |
| cg02338345 | 0.736 | 0.914 | 0.986 | 0.98  | 0.827 | 0.874 | 0.746 | 0.172 |
| cg07268332 | 0.543 | 0.931 | 0.927 | 0.944 | 0.144 | 0.825 | 0.146 | 0.021 |
| cg20043649 | 0.688 | 0.97  | 0.975 | 0.986 | 0.256 | 0.499 | 0.22  | 0.026 |
| cg22460173 | 0.828 | 0.937 | 0.966 | 0.942 | 0.748 | 0.81  | 0.653 | 0.159 |
| cg15586392 | 0.949 | 0.925 | 0.937 | 0.951 | 0.184 | 0.422 | 0.164 | 0.029 |
| cg26930596 | 0.971 | 0.948 | 0.942 | 0.979 | 0.085 | 0.307 | 0.092 | 0.014 |

**table S1: The blood reference database.** This table lists the 333 DHS-DMCs of the blood reference DNAm database, with the DNAm beta-values for each of 7 main blood cell subtypes, as indicated.

| CpGs       | Genes   | Position         | Count |
|------------|---------|------------------|-------|
| cg03636183 | F2RL3   | chr19:17,000,586 | 12    |
| cg05575921 | AHRR    | chr5:373,378     | 11    |
| cg19859270 | GPR15   | chr3:98,251,295  | 10    |
| cg21161138 | AHRR    | chr5:399,361     | 9     |
| cg05951221 | 2q37.1  | chr2:233,284,402 | 8     |
| cg01940273 | 2q37.1  | chr2:233,284,935 | 7     |
| cg06126421 | 6p21.33 | chr6:30,720,081  | 7     |
| cg21566642 | 2q37.1  | chr2:233,284,662 | 7     |
| cg02657160 | CPOX    | chr3:98,311,063  | 6     |
| cg03329539 | 2q37.1  | chr2:233,283,329 | 6     |
| cg06644428 | 2q37.1  | chr2:233,284,113 | 6     |
| cg14817490 | AHRR    | chr5:392,920     | 6     |
| cg25648203 | AHRR    | chr5:395,445     | 6     |
| cg26703534 | AHRR    | chr5:377,358     | 6     |
| cg03991871 | AHRR    | chr5:368,448     | 5     |
| cg09935388 | GFI1    | chr1:92,947,588  | 5     |
| cg19572487 | RARA    | chr17:38,476,025 | 5     |

|            |           |                  |   |
|------------|-----------|------------------|---|
| cg23576855 | AHRR      | chr5:373,300     | 5 |
| cg24859433 | IER3      | chr6:30,720,204  | 5 |
| cg25189904 | GNG12     | chr1:68,299,493  | 5 |
| cg01731783 | C14orf43  | chr14:74,211,789 | 4 |
| cg01899089 | AHRR      | chr5:369,969     | 4 |
| cg04885881 | Unknown   | chr1:11,123,118  | 4 |
| cg07123182 | KCNQ1     | chr11:2,722,391  | 4 |
| cg08709672 | AVPR1B    | chr1:206,224,335 | 4 |
| cg11314684 | AKT3      | chr1:244,006,289 | 4 |
| cg11660018 | PRSS23    | chr11:86,510,915 | 4 |
| cg12803068 | MYO1G     | chr7:45,002,919  | 4 |
| cg12806681 | AHRR      | chr5:368,395     | 4 |
| cg12876356 | GFI1      | chr1:92,946,825  | 4 |
| cg15342087 | IER3      | chr6:30,720,210  | 4 |
| cg20295214 | AVPR1B    | chr1:206,226,795 | 4 |
| cg21611682 | LRP5      | chr11:68,138,269 | 4 |
| cg22132788 | MYO1G     | chr7:45,002,487  | 4 |
| cg27241845 | Unknown   | chr2:233,250,371 | 4 |
| cg00310412 | SEMA7A    | chr15:74,724,919 | 3 |
| cg01692968 | Unknown   | chr9:108,005,349 | 3 |
| cg01901332 | ARRB1     | chr11:75,031,055 | 3 |
| cg02451831 | KIAA0087  | chr7:26,578,099  | 3 |
| cg03547355 | Unknown   | chr1:227,003,061 | 3 |
| cg05284742 | ITPK1     | chr14:93,552,129 | 3 |
| cg06060868 | SDHA      | chr5:231,934     | 3 |
| cg11207515 | CNTNAP2   | chr7:146,904,206 | 3 |
| cg11231349 | NOS1AP    | chr1:162,050,657 | 3 |
| cg12075928 | PTK2      | chr8:141,801,307 | 3 |
| cg13193840 | 2q37.1    | chr2:233,285,289 | 3 |
| cg13976502 | C14orf43  | chr14:74,227,875 | 3 |
| cg14580211 | C5orf62   | chr5:150,161,300 | 3 |
| cg14753356 | Unknown   | chr6:30,720,109  | 3 |
| cg18316974 | GFI1      | chr1:92,947,035  | 3 |
| cg21121843 | HTT       | chr4:3,203,983   | 3 |
| cg21913886 | TMEM51    | chr1:15,485,346  | 3 |
| cg22851561 | C14orf43  | chr14:74,214,183 | 3 |
| cg23079012 | LINC00299 | chr2:8,343,711   | 3 |
| cg23161492 | ANPEP     | chr15:90,357,203 | 3 |
| cg23771366 | PRSS23    | chr11:86,510,999 | 3 |
| cg23916896 | AHRR      | chr5:368,805     | 3 |
| cg24090911 | AHRR      | chr5:400,732     | 3 |
| cg24996979 | C14orf43  | chr14:74,223,355 | 3 |
| cg25949550 | CNTNAP2   | chr7:145,814,306 | 3 |
| cg26271591 | NFE2L2    | chr2:178,125,956 | 3 |

**table S2: Gold-standard list of 62 smoking-associated DMCs (sDMCs).** List as curated and defined in Gao et al. Columns label the 450k probe ID, gene symbol, chromosome position and the number of independent whole blood EWAS reporting this probe to be a sDMC.

| probeID    | t-stat | P          | Symbol  | Included(ADJ) |
|------------|--------|------------|---------|---------------|
| cg05575921 | -13.04 | 1E-23      | AHRR    | TRUE          |
| cg21566642 | -12.9  | 2E-23      | NA      | TRUE          |
| cg05951221 | -12.02 | 2E-21      | NA      | TRUE          |
| cg01940273 | -11.86 | 4E-21      | NA      | TRUE          |
| cg03636183 | -10.16 | 3E-17      | F2RL3   | TRUE          |
| cg26703534 | -9.23  | 3E-15      | AHRR    | TRUE          |
| cg21161138 | -9.19  | 4E-15      | AHRR    | TRUE          |
| cg06126421 | -8.48  | 2E-13      | NA      | TRUE          |
| cg19859270 | -8.33  | 3E-13      | GPR15   | TRUE          |
| cg09935388 | -8.18  | 7E-13      | GFI1    | TRUE          |
| cg03329539 | -7.69  | 8E-12      | NA      | TRUE          |
| cg15342087 | -7.13  | 1E-10      | NA      | TRUE          |
| cg26963277 | -6.7   | 0.00000001 | NA      | TRUE          |
| cg24859433 | -6.6   | 0.00000002 | NA      | TRUE          |
| cg14817490 | -6.56  | 0.00000002 | AHRR    | TRUE          |
| cg18316974 | -6.55  | 0.00000002 | GFI1    | TRUE          |
| cg18146737 | -6.45  | 0.00000004 | GFI1    | TRUE          |
| cg12876356 | -6.39  | 0.00000005 | GFI1    | TRUE          |
| cg11660018 | -6.29  | 0.00000008 | PRSS23  | TRUE          |
| cg25648203 | -6.09  | 0.00000002 | AHRR    | TRUE          |
| cg00310412 | -6.03  | 0.00000002 | SEMA7A  | TRUE          |
| cg27241845 | -6.01  | 0.00000003 | NA      | TRUE          |
| cg20295214 | -5.89  | 0.00000005 | AVPR1B  | TRUE          |
| cg21322436 | -5.8   | 0.00000007 | CNTNAP2 | TRUE          |
| cg09662411 | -5.47  | 0.00000003 | GFI1    | TRUE          |
| cg03991871 | -5.4   | 0.00000004 | AHRR    | TRUE          |
| cg25949550 | -5.39  | 0.00000004 | CNTNAP2 | TRUE          |
| cg23771366 | -5.22  | 0.00000009 | PRSS23  | TRUE          |
| cg23161492 | -5.14  | 0.000001   | ANPEP   | TRUE          |
| cg12806681 | -5.09  | 0.000002   | AHRR    | FALSE         |
| cg25189904 | -5.08  | 0.000002   | GNG12   | TRUE          |
| cg24090911 | -5.03  | 0.000002   | AHRR    | TRUE          |
| cg08709672 | -4.96  | 0.000003   | AVPR1B  | TRUE          |
| cg06644428 | -4.95  | 0.000003   | NA      | TRUE          |

**table S3: Smoking-associated DMCs with no adjustment for cell-type composition.** This table lists the 34 smoking-associated DMCs obtained at a FDR < 0.05 in the 152 whole blood Illumina 450k samples from the MRC1946 birth cohort data, only using adjustment for beadchip and no adjustment for changes in blood cell subtype composition. We provide the Illumina probeID, the t-statistic of differential methylation, the associated P-value, the gene symbol (if available) the probe maps to, and whether the probe was included in the top (FDR<0.05) list from the adjusted analysis.

| <b>probeID</b> | <b>t-stat</b> | <b>P</b>   | <b>Symbol</b> | <b>Included(UnADJ)</b> |
|----------------|---------------|------------|---------------|------------------------|
| cg21566642     | -12.45        | 5E-22      | NA            | TRUE                   |
| cg05575921     | -12.43        | 5E-22      | AHRR          | TRUE                   |
| cg05951221     | -12.16        | 2E-21      | NA            | TRUE                   |
| cg01940273     | -11.81        | 1E-20      | NA            | TRUE                   |
| cg03636183     | -9.51         | 1E-15      | F2RL3         | TRUE                   |
| cg26703534     | -8.92         | 2E-14      | AHRR          | TRUE                   |
| cg21161138     | -8.58         | 1E-13      | AHRR          | TRUE                   |
| cg06126421     | -8.43         | 3E-13      | NA            | TRUE                   |
| cg19859270     | -8.4          | 3E-13      | GPR15         | TRUE                   |
| cg03329539     | -7.89         | 4E-12      | NA            | TRUE                   |
| cg09935388     | -7.58         | 2E-11      | GFI1          | TRUE                   |
| cg15342087     | -6.87         | 5E-10      | NA            | TRUE                   |
| cg24859433     | -6.68         | 0.00000001 | NA            | TRUE                   |
| cg11660018     | -6.39         | 0.00000005 | PRSS23        | TRUE                   |
| cg20295214     | -6.37         | 0.00000006 | AVPR1B        | TRUE                   |
| cg12103569     | 6.33          | 0.00000007 | SFRS8         | FALSE                  |
| cg03707168     | -6.17         | 0.00000001 | PPP1R15A      | FALSE                  |
| cg03604011     | 6.13          | 0.00000002 | AHRR          | FALSE                  |
| cg14817490     | -6.11         | 0.00000002 | AHRR          | TRUE                   |
| cg18316974     | -6.08         | 0.00000002 | GFI1          | TRUE                   |
| cg06235438     | -5.92         | 0.00000005 | ITGAL         | FALSE                  |
| cg00310412     | -5.91         | 0.00000005 | SEMA7A        | TRUE                   |
| cg18146737     | -5.89         | 0.00000005 | GFI1          | TRUE                   |
| cg14753356     | -5.86         | 0.00000006 | NA            | FALSE                  |
| cg17287155     | -5.86         | 0.00000006 | AHRR          | FALSE                  |
| cg26963277     | -5.84         | 0.00000006 | NA            | TRUE                   |
| cg12876356     | -5.77         | 0.00000009 | GFI1          | TRUE                   |
| cg16771652     | -5.64         | 0.00000002 | NOD2          | FALSE                  |
| cg27241845     | -5.55         | 0.00000002 | NA            | TRUE                   |
| cg25648203     | -5.48         | 0.00000003 | AHRR          | TRUE                   |
| cg21322436     | -5.47         | 0.00000003 | CNTNAP2       | TRUE                   |
| cg24090911     | -5.42         | 0.00000004 | AHRR          | TRUE                   |
| cg04583842     | 5.41          | 0.00000004 | BANP          | FALSE                  |
| cg27513574     | 5.37          | 0.00000005 | SLC34A2       | FALSE                  |



|            |       |           |              |       |
|------------|-------|-----------|--------------|-------|
| cg13470504 | 5.31  | 0.0000007 | RP3-398D13.1 | FALSE |
| cg04885881 | -5.27 | 0.0000008 | NA           | FALSE |
| cg25189904 | -5.26 | 0.0000008 | GNG12        | TRUE  |
| cg10420527 | -5.23 | 0.0000009 | LRP5         | FALSE |
| cg11557636 | 5.22  | 0.000001  | KIAA1239     | FALSE |
| cg14580211 | -5.19 | 0.000001  | MST150       | FALSE |
| cg12147622 | -5.19 | 0.000001  | NA           | FALSE |
| cg04332373 | 5.13  | 0.000001  | CD38         | FALSE |
| cg07826859 | -5.08 | 0.000002  | MYO1G        | FALSE |
| cg09662411 | -5.07 | 0.000002  | GFI1         | TRUE  |
| cg12075928 | -5.05 | 0.000002  | PTK2         | FALSE |
| cg25748521 | -5.05 | 0.000002  | HIPK2        | FALSE |
| cg06644428 | -4.98 | 0.000003  | NA           | TRUE  |
| cg06256858 | 4.94  | 0.000003  | CRMP1        | FALSE |
| cg14114133 | -4.93 | 0.000003  | NA           | FALSE |
| cg23161492 | -4.93 | 0.000003  | ANPEP        | TRUE  |
| cg25949550 | -4.92 | 0.000003  | CNTNAP2      | TRUE  |
| cg06285727 | -4.9  | 0.000004  | ATG16L2      | FALSE |
| cg03843000 | 4.9   | 0.000004  | TBX5         | FALSE |
| cg23771366 | -4.88 | 0.000004  | PRSS23       | TRUE  |
| cg03991871 | -4.88 | 0.000004  | AHRR         | TRUE  |
| cg01763916 | -4.88 | 0.000004  | SMAP2        | FALSE |
| cg08047426 | 4.88  | 0.000004  | ZNF440       | FALSE |
| cg03427663 | -4.84 | 0.000005  | NA           | FALSE |
| cg27537125 | -4.84 | 0.000005  | NA           | FALSE |
| cg03440944 | -4.83 | 0.000005  | C7orf40      | FALSE |
| cg13867915 | 4.82  | 0.000005  | ARID1A       | FALSE |
| cg14323204 | 4.81  | 0.000005  | NA           | FALSE |
| cg18625627 | 4.81  | 0.000005  | TSHR         | FALSE |
| cg08709672 | -4.79 | 0.000006  | AVPR1B       | TRUE  |
| cg03450842 | -4.76 | 0.000007  | ZMIZ1        | FALSE |
| cg23315637 | -4.75 | 0.000007  | NA           | FALSE |
| cg07251887 | -4.75 | 0.000007  | NA           | FALSE |
| cg02128112 | 4.72  | 0.000008  | NA           | FALSE |
| cg03907390 | 4.72  | 0.000008  | GRK5         | FALSE |
| cg05284742 | -4.71 | 0.000008  | ITPK1        | FALSE |

**table S4: Smoking-associated DMCs as obtained using EpiDISH.** This table lists the 70 smoking-associated DMCs obtained at a FDR < 0.05 in the 152 whole blood Illumina 450k samples from the MRC1946 birth cohort data, after adjustment for changes in blood cell subtype composition (cellular proportions as estimated using EpiDISH) in addition to beadchip. We provide the Illumina probeID, the t-statistic of differential methylation, the associated P-value, the gene symbol (if available) the probe maps to, and whether the probe was included

in the top (FDR<0.05) list from the unadjusted analysis.

**References:**

1. Reinius LE, Acevedo N, Joerink M, Pershagen G, Dahlen SE, Greco D, Soderhall C, Scheynius A, Kere J: **Differential DNA methylation in purified human blood cells: implications for cell lineage and studies on disease susceptibility.** *PLoS One* 2012, **7**:e41361.
2. Zilbauer M, Rayner TF, Clark C, Coffey AJ, Joyce CJ, Palta P, Palotie A, Lyons PA, Smith KG: **Genome-wide methylation analyses of primary human leukocyte subsets identifies functionally important cell-type-specific hypomethylated regions.** *Blood* 2013, **122**:e52-60.
3. Gao X, Jia M, Zhang Y, Breitling LP, Brenner H: **DNA methylation changes of whole blood cells in response to active smoking exposure in adults: a systematic review of DNA methylation studies.** *Clin Epigenetics* 2015, **7**:113.
